# Supplementary material for: Comparative Genomic and Transcriptomic Analyses of LNCaP and C4-2B Prostate Cancer Cell Lines
Source: PLoS One. 2014 Feb 28;9(2):e90002. doi: 10.1371/journal.pone.0090002 (PMC3938550; doi:10.1371/journal.pone.0090002)
Supplement: Table S5 — Filters used to identify point mutations in the transcriptomes of LNCaP and C4-2B cells. (XLSX) [file pone.0090002.s008.xlsx]

## Sheet: Sheet1
Table S3. Filters used to identify point mutations in the transcriptomes of LNCaP and C4-2B cells
Number of SNVs	LNCaP	C4-2B
Predicted	27 748	32 594
Not 'lowqual' according to GATK	15 250	18 655
With coverage ≥ 12x	12 532	15 807
With mutation allelic frequency ≥ 30%	6 872	7 669
Not present in dbSNP130	6 802	7 606
Nonsense or missense	1 551	1 932
Without strand bias	1 606	1 881
In common	1 054
Mutation allelic frequency denotes the number of reads containing the mutation
divided by the total number of reads.
